# Supplementary material for: Non-suicidal self-injury in Chinese population: a scoping review of prevalence, method, risk factors and preventive interventions
Source: PubMed Central journal article supplement — Lancet Reg Health West Pac. 2023 May 26;37:100794. doi: 10.1016/j.lanwpc.2023.100794 (PMC10485683; doi:10.1016/j.lanwpc.2023.100794), 2023-05-26
Supplement: mmc2.pdf [file mmc2.pdf]

|                     | 1. Was true randomization used for assignment of participants to treatment groups?1 | 2. Was allocation to treatment groups concealed? | 3. Were treatment groups similar at the baseline? | 4. Were participants blind to treatment assignment? | 5. Were those delivering treatment blind to treatment assignment? | 6. Were outcomes assessors blind to treatment assignment? | 7. Were treatment groups treated identically other than the intervention of interest? | 8. Was follow up complete and if not, were differences between groups in terms of their follow up adequately described and analyzed? | 9. Were participants analyzed in the groups to which they were randomized? | 10. Were outcomes measured in the same way for treatment groups.? | 11. Were outcomes measured in a reliable way? | 12. Was appropriate statistical analysis used? | 13. Was the trial design appropriate, and any deviations from the standard RCT design (individual randomization, parallel groups) accounted for in the conduct and analysis of the trial? |
|---------------------|-------------------------------------------------------------------------------------|--------------------------------------------------|---------------------------------------------------|-----------------------------------------------------|-------------------------------------------------------------------|-----------------------------------------------------------|---------------------------------------------------------------------------------------|--------------------------------------------------------------------------------------------------------------------------------------|----------------------------------------------------------------------------|-------------------------------------------------------------------|-----------------------------------------------|------------------------------------------------|-------------------------------------------------------------------------------------------------------------------------------------------------------------------------------------------|
| Ding et al. (2021)  | Yes                                                                                 | Unclear                                          | Yes                                               | Unclear                                             | Unclear                                                           | Unclear                                                   | Yes                                                                                   | Yes                                                                                                                                  | No                                                                         | Yes                                                               | Yes                                           | Yes                                            | Yes                                                                                                                                                                                       |
| Na et al. (2022)    | NA                                                                                  | NA                                               | Yes                                               | NA                                                  | NA                                                                | NA                                                        | Yes                                                                                   | No                                                                                                                                   | NA                                                                         | Yes                                                               | Yes                                           | Yes                                            | NA                                                                                                                                                                                        |
| Quan et al (2020)   | Yes                                                                                 | Unclear                                          | Yes                                               | Unclear                                             | Unclear                                                           | Unclear                                                   | Yes                                                                                   | No                                                                                                                                   | Yes*                                                                       | Yes                                                               | Yes                                           | Yes                                            | Yes                                                                                                                                                                                       |
| Yu et al. (2021)    | Yes                                                                                 | Unclear                                          | Unclear                                           | Unclear                                             | Unclear                                                           | Yes                                                       | Yes                                                                                   | No                                                                                                                                   | Unclear                                                                    | Yes                                                               | Yes                                           | Yes                                            | Yes                                                                                                                                                                                       |
| Zeng & Zhou (2022)  | NA                                                                                  | NA                                               | Yes                                               | NA                                                  | NA                                                                | NA                                                        | Yes                                                                                   | Yes                                                                                                                                  | NA                                                                         | Yes                                                               | Unclear                                       | Yes                                            | NA                                                                                                                                                                                        |
| Chen et al. (2022)  | NA                                                                                  | NA                                               | No                                                | NA                                                  | NA                                                                | NA                                                        | NA                                                                                    | No                                                                                                                                   | NA                                                                         | NA                                                                | NA                                            | NA                                             | NA                                                                                                                                                                                        |
| Lin & Kuang (2021)  | Unclear                                                                             | Unclear                                          | Yes                                               | Unclear                                             | Unclear                                                           | Unclear                                                   | Yes                                                                                   | No                                                                                                                                   | Yes*                                                                       | Yes                                                               | Yes                                           | Yes                                            | Yes                                                                                                                                                                                       |
| Su et al. (2022)    | Yes                                                                                 | Unclear                                          | Unclear                                           | Unclear                                             | Unclear                                                           | Unclear                                                   | Yes                                                                                   | No                                                                                                                                   | Yes*                                                                       | Yes                                                               | Unclear                                       | Yes                                            | Yes                                                                                                                                                                                       |
| Zhang & Wang (2022) | NA                                                                                  | NA                                               | Yes                                               | NA                                                  | NA                                                                | NA                                                        | Yes                                                                                   | No                                                                                                                                   | NA                                                                         | Yes                                                               | Yes                                           | Yes                                            | NA                                                                                                                                                                                        |
| Huang et al. (2022) | Unclear                                                                             | Unclear                                          | Unclear                                           | No                                                  | Unclear                                                           | Unclear                                                   | Yes                                                                                   | No                                                                                                                                   | Yes*                                                                       | Yes                                                               | Yes                                           | Yes                                            | Yes                                                                                                                                                                                       |
| Lu et al. (2022)    | Yes                                                                                 | Unclear                                          | Yes                                               | Unclear                                             | Unclear                                                           | Unclear                                                   | Yes                                                                                   | No                                                                                                                                   | No                                                                         | Yes                                                               | Yes                                           | Yes                                            | Yes                                                                                                                                                                                       |
| Zhang et al (2022)  | Yes                                                                                 | Unclear                                          | Unclear                                           | Unclear                                             | Unclear                                                           | Unclear                                                   | Yes                                                                                   | Unclear                                                                                                                              | Yes*                                                                       | Yes                                                               | Unclear                                       | Yes                                            | Yes                                                                                                                                                                                       |
